# Supplementary material for: Multi-mode anti-counterfeiting guarantees from a single material CaCd2Ga2Ge3O12:Tb3+,Yb3+ – two stimuli-responsive and four-state emission
Source: Royal Society of Chemistry journal article supplement (doi:10.1039/d2dt03941a), 2022-12-31
Supplement: d2dt03941a1.pdf [file d2dt03941a1.pdf]

## Multi-mode Anti-counterfeiting Guarantees from a Single Material

### **CaCd<sub>2</sub>Ga<sub>2</sub>Ge<sub>3</sub>O<sub>12</sub>:Tb<sup>3+</sup>,Yb<sup>3+</sup>-Two Stimuli-responsive and Four-state Emission**

Zhuobing Wang<sup>a,b,c</sup>, Liwei Yang<sup>a</sup>, Zhenbin Wang<sup>a,b,\*</sup>, Jiajia Cao<sup>a</sup>, Cunhua Ma<sup>a,b</sup>, Mingjin Zhang<sup>a,b</sup>,  
Weisheng Liu<sup>a,b,c\*</sup>

<sup>a</sup> School of Chemistry and Chemical Engineering, Qinghai Normal University, Xining 810008  
China

<sup>b</sup> Academy of Plateau Science and Sustainability, People's Government Of Qinghai Province &  
Beijing Normal University, Xining, 810016, China

<sup>c</sup> Key Laboratory of Nonferrous Metal Chemistry and Resources Utilization of Gansu Province  
and State Key Laboratory of Applied Organic Chemistry, College of Chemistry and Chemical  
Engineering, Lanzhou University, Lanzhou, 730000, China

\*Corresponding author: E-mail addresses:wangzhhqnu@163.com

liuws@lzu.edu.cn

Tel.: +86 / (0)971-5213524

**Table S1 Crystal Data of CCGGO and CCGGO:0.01Tb<sup>3+</sup>,0.005Yb<sup>3+</sup>.**

| Crystal data         |                                      |                                                   |
|----------------------|--------------------------------------|---------------------------------------------------|
| Chemical formula     | CCGGO                                | CCGGO:0.01Tb <sup>3+</sup> ,0.005Yb <sup>3+</sup> |
| Crystal system       | cuibc                                | cuibc                                             |
| Space group          | <i>Ia-3d</i> (230)                   | <i>Ia-3d</i> (230)                                |
| Unit cell dimensions | $a = b = c = 12.2050(4) \text{ \AA}$ | $a = b = c = 12.2011(4) \text{ \AA}$              |
| Volume               | 1818.08(3) $\text{\AA}^3$            | 1816.33(1) $\text{\AA}^3$                         |
| Z                    | 8                                    | 8                                                 |
| $R_{wp}$             | 8.75%                                | 11.23%                                            |
| $R_p$                | 4.23%                                | 6.79%                                             |
| $\chi^2$             | 1.94                                 | 1.97                                              |

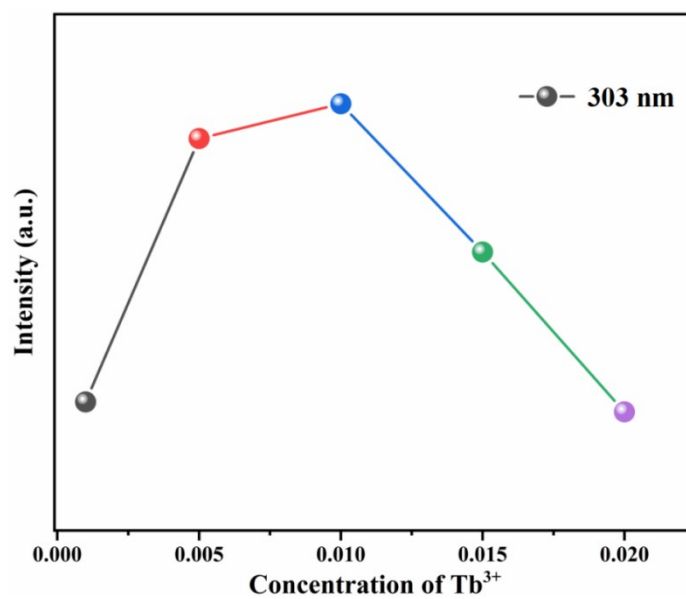**Fig.S1** Excitation intensity dependence on concentration of Tb<sup>3+</sup>.

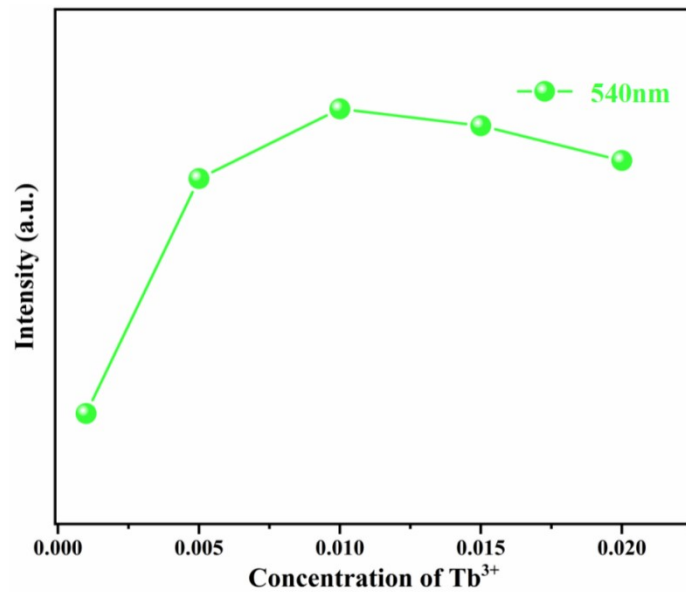

**Fig.S2** Relative intensity for various concentration of Tb<sup>3+</sup>.

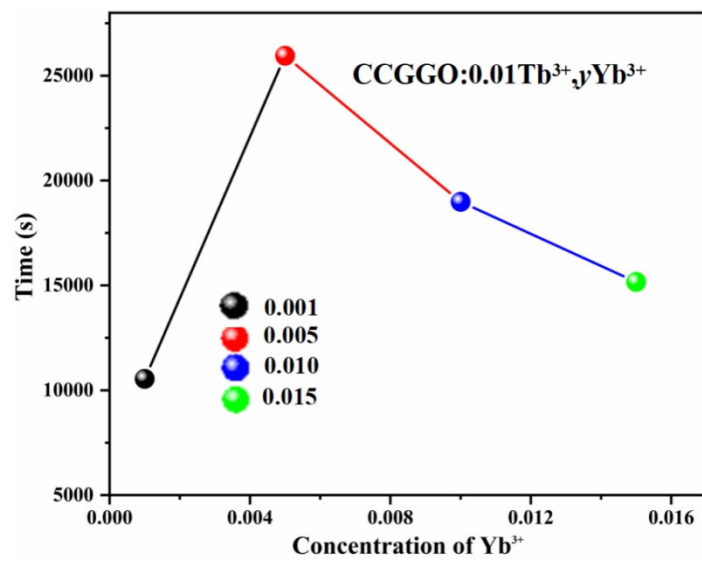

**Fig.S3** The relative time for various concentration of Yb<sup>3+</sup>.

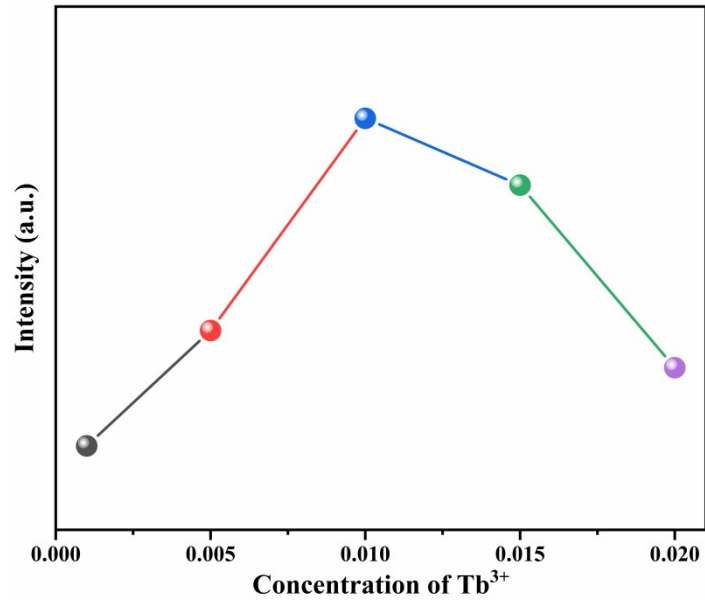

**Fig.S4** Diagram of TL intensity versus Tb<sup>3+</sup> doping concentration.

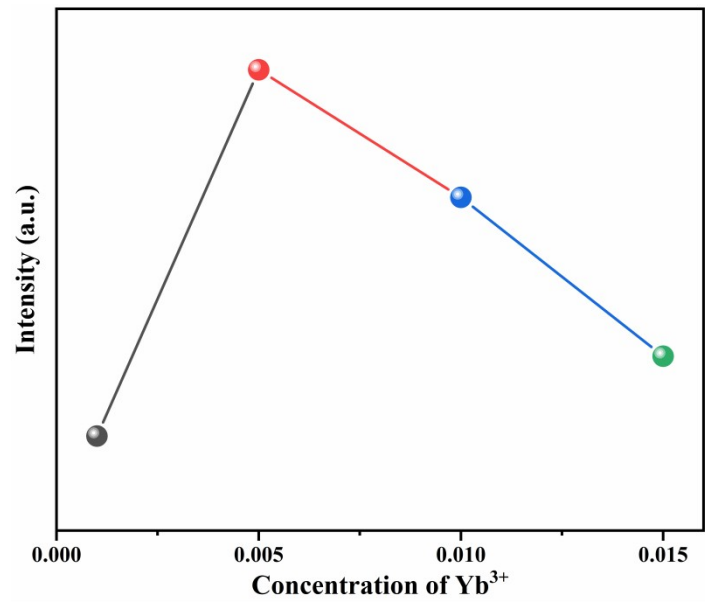

**Fig.S5** The relative intensity for various concentration of Yb<sup>3+</sup>.
